# Supplementary material for: Superior energy storage performance and fatigue resistance in ferroelectric BCZT thin films grown in an oxygen-rich atmosphere
Source: Royal Society of Chemistry journal article supplement (doi:10.1039/c9tc00569b), 2019-01-01
Supplement: c9tc00569b1.pdf [file c9tc00569b1.pdf]

## Supplementary information

### Superior energy storage performance, and fatigue resistance in ferroelectric BCZT thin films grown in oxygen rich atmosphere

*Seelam Rangaswamy Reddy, Velidandla Venkata Bhanu Prasad, Sandip Bysakh, Vishnu Shanker, Neha Hebalkar and Subir Roy*

**AFM images:**

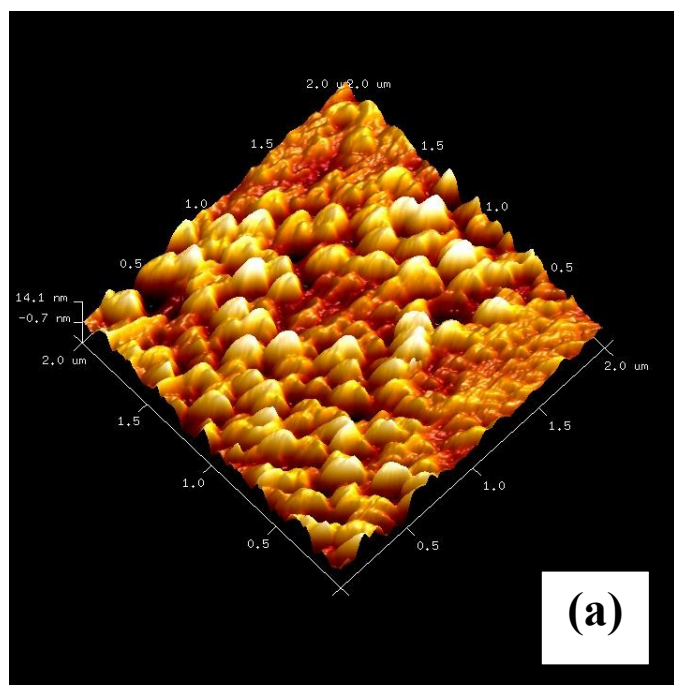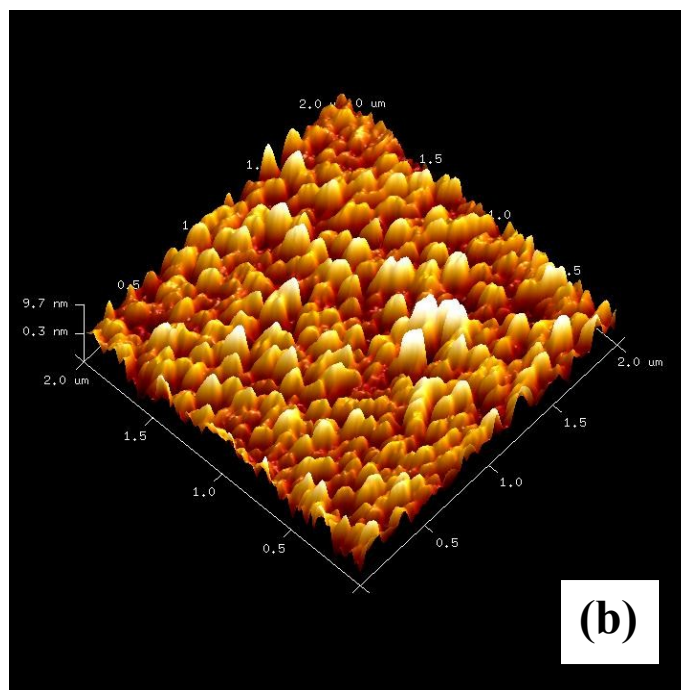

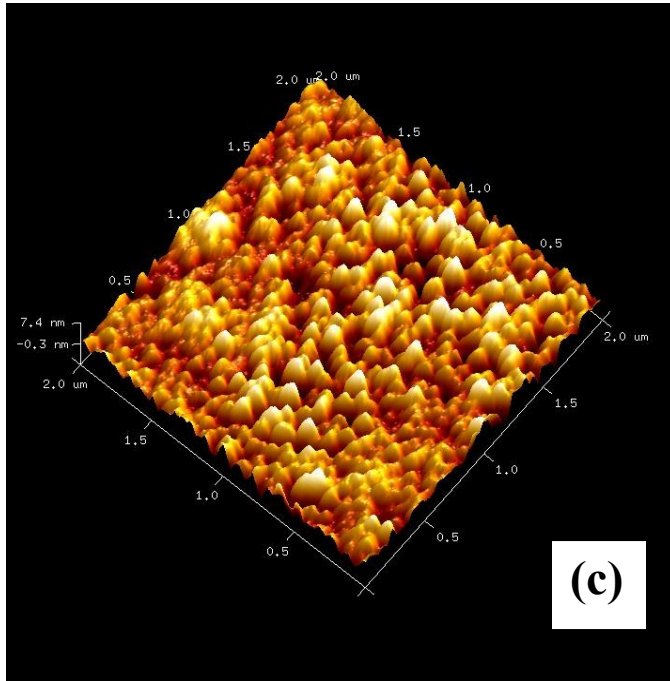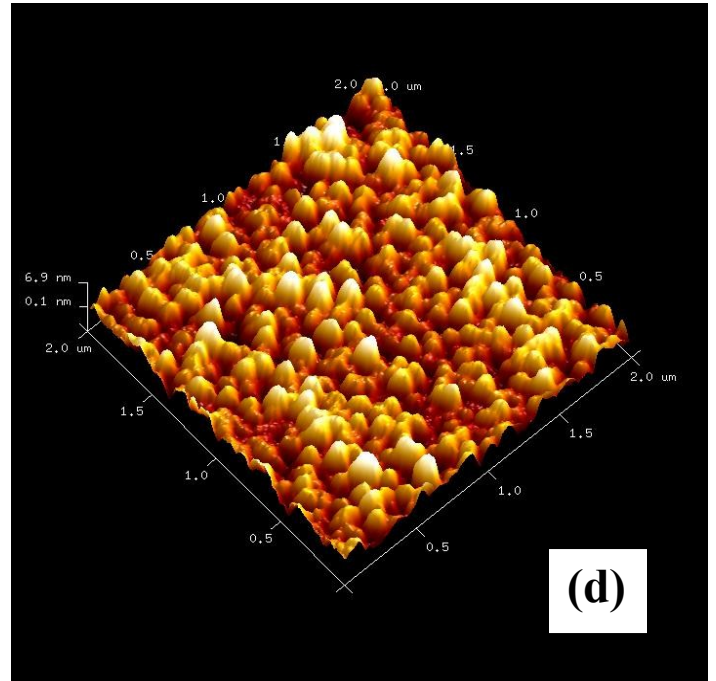

**Figure S1.** AFM images of (a) BCZT700-air, (b) BCZT800-air, (c) BCZT700-O<sub>2</sub> and (d) BCZT800-O<sub>2</sub> films.

**Table S1.** Ferroelectric properties of the air and oxygen processed BCZT films.

| <b>BCZT film</b>       | <b>P<sub>max</sub></b><br><b>(<math>\mu\text{C}/\text{cm}^2</math>) at</b><br><b>1000 kV/cm</b> | <b>P<sub>r</sub></b><br><b>(<math>\mu\text{C}/\text{cm}^2</math>)</b><br><b>at 1000</b><br><b>kV/cm</b> | <b>Coercive</b><br><b>field</b><br><b>(kV/cm)</b> | <b>P<sub>max</sub></b><br><b>(<math>\mu\text{C}/\text{cm}^2</math>)</b><br><b>at 2000</b><br><b>kV/cm</b> | <b>P<sub>r</sub></b><br><b>(<math>\mu\text{C}/\text{cm}^2</math>)</b><br><b>at 2000</b><br><b>kV/cm</b> |
|------------------------|-------------------------------------------------------------------------------------------------|---------------------------------------------------------------------------------------------------------|---------------------------------------------------|-----------------------------------------------------------------------------------------------------------|---------------------------------------------------------------------------------------------------------|
| BCZT700-air            | 70                                                                                              | 22                                                                                                      | 222                                               | ---                                                                                                       | ---                                                                                                     |
| BCZT800-air            | 82                                                                                              | 25                                                                                                      | 185                                               | ---                                                                                                       | ---                                                                                                     |
| BCZT700-O <sub>2</sub> | 58                                                                                              | 4                                                                                                       | 49                                                | 87                                                                                                        | 11                                                                                                      |
| BCZT800-O <sub>2</sub> | 73                                                                                              | 5                                                                                                       | 45                                                | 106                                                                                                       | 12.9                                                                                                    |

**Table S2.** Polarization and energy storage properties of the oxygen-processed BCZT films recorded before and after fatigue test.

| <b>BCZT film</b>             | <b>P<sub>max</sub></b><br><b>(<math>\mu\text{C}/\text{cm}^2</math>)</b> | <b>P<sub>r</sub></b><br><b>(<math>\mu\text{C}/\text{cm}^2</math>)</b> | <b>ESD</b><br><b>(<math>\text{J}/\text{Cm}^3</math>)</b> | <b>Efficiency</b><br><b>(%) virgin</b> | <b>P<sub>max</sub></b><br><b>(<math>\mu\text{C}/\text{cm}^2</math>)</b> | <b>P<sub>r</sub></b><br><b>(<math>\mu\text{C}/\text{cm}^2</math>)</b> | <b>ESD</b><br><b>(<math>\text{J}/\text{Cm}^3</math>)</b> | <b>Efficiency</b><br><b>(%)</b> |
|------------------------------|-------------------------------------------------------------------------|-----------------------------------------------------------------------|----------------------------------------------------------|----------------------------------------|-------------------------------------------------------------------------|-----------------------------------------------------------------------|----------------------------------------------------------|---------------------------------|
|                              | <b>Virgin</b>                                                           | <b>Virgin</b>                                                         | <b>Virgin</b>                                            |                                        | <b>fatigued</b>                                                         | <b>fatigued</b>                                                       | <b>fatigued</b>                                          | <b>fatigued</b>                 |
| <b>BCZT700-O<sub>2</sub></b> | 87                                                                      | 11                                                                    | 54.5                                                     | 68                                     | 85                                                                      | 12.5                                                                  | 50.6                                                     | 63                              |
| <b>BCZT800-O<sub>2</sub></b> | 106                                                                     | 12.9                                                                  | 64.8                                                     | 73                                     | 105                                                                     | 13.2                                                                  | 63.6                                                     | 71                              |
